# Supplementary material for: Decoupling environmental effects and host population dynamics for anthrax, a classic reservoir-driven disease
Source: PubMed Central journal article supplement (PMC6291251; doi:10.1371/journal.pone.0208621), 2018-12-12
Supplement: pone.0208621.s005.pdf [file pone.0208621.s005.pdf]

**Decoupling environmental effects and bison (*Bison bison*  
*bison*) population dynamics in anthrax, a classic  
reservoir-driven disease**

Juan Pablo Gomez, Dawn Nekorchuk, Liang Mao, Sadie J. Ryan, José  
Miguel Ponciano, Jason K. Blackburn.

**S2 Appendix**

Observed number of cases during the 2008 Montana anthrax outbreak. Data is presented on a daily basis and only for the range of weeks for which there was at least one anthrax case reported. Date is in Month/Day/Year format.

| Date    | Week | Deaths |
|---------|------|--------|
| 7/23/08 | 30   | 2      |
| 7/31/08 | 31   | 5      |
| 8/1/08  | 31   | 19     |
| 8/2/08  | 31   | 11     |
| 8/3/08  | 32   | 18     |
| 8/4/08  | 32   | 28     |
| 8/5/08  | 32   | 27     |
| 8/6/08  | 32   | 56     |
| 8/7/08  | 32   | 12     |
| 8/8/08  | 32   | 6      |
| 8/9/08  | 32   | 18     |
| 8/10/08 | 33   | 13     |
| 8/11/08 | 33   | 7      |
| 8/12/08 | 33   | 5      |
| 8/13/08 | 33   | 4      |
| 8/14/08 | 33   | 2      |
| 8/15/08 | 33   | 3      |
| 8/16/08 | 33   | 3      |
| 8/17/08 | 34   | 11     |
| 8/18/08 | 34   | 5      |
| 8/19/08 | 34   | 1      |
| 8/20/08 | 34   | 4      |
| 8/21/08 | 34   | 1      |
| 8/22/08 | 34   | 4      |
| 8/23/08 | 34   | 6      |
| 8/24/08 | 35   | 7      |
| 8/25/08 | 35   | 0      |
| 8/26/08 | 35   | 0      |
| 8/27/08 | 35   | 0      |
| 8/28/08 | 35   | 0      |
| 8/29/08 | 35   | 2      |
| 8/30/08 | 35   | 0      |
| 8/31/08 | 36   | 0      |
| 9/1/08  | 36   | 0      |
| 9/2/08  | 36   | 0      |
| 9/3/08  | 36   | 4      |
